# Supplementary material for: Loss of Eicosapentaenoic Acid (EPA) after Retort Sterilization of the EPA-BCAA Fortified Complete Nutrition Drink
Source: MDPI journal article supplement (doi:10.3390/foods11142023), 2022-07-08
Supplement: s1 [file s1]

Figure S1: The graphical plot of heat penetration study of the retort sterilization process

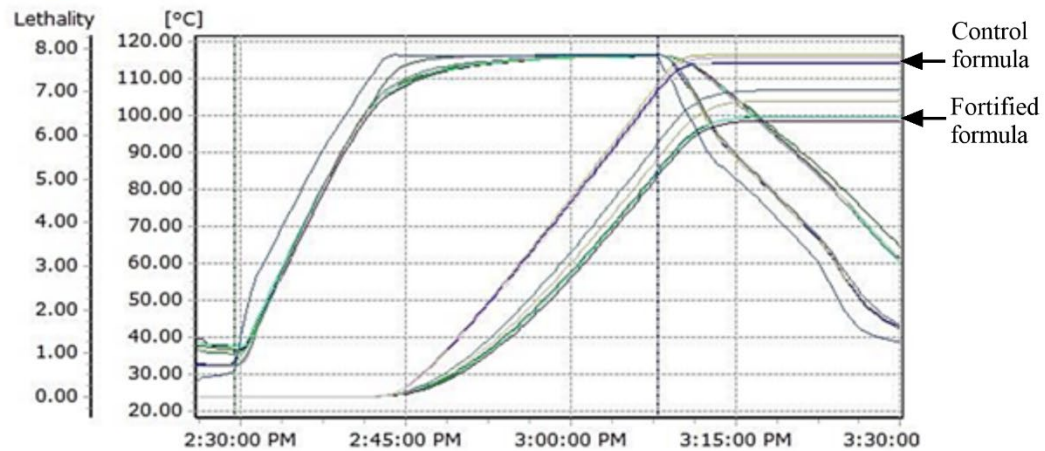

Test run 2 : Process 116°C / 25 minutes

| Name                   | Description   | Start Time | End Time   | Max. Value |
|------------------------|---------------|------------|------------|------------|
| LC 01 (F0) Lethality 1 | L-Calculation | 2:00:00 PM | 3:30:00 PM | 7.65       |
| LC 01 (F0) Lethality 2 | L-Calculation | 2:00:00 PM | 3:08:00 PM | 7.03       |
| LC 02 (F0) Lethality 1 | L-Calculation | 2:00:00 PM | 3:30:00 PM | 6.44       |
| LC 02 (F0) Lethality 2 | L-Calculation | 2:00:00 PM | 3:08:00 PM | 5.21       |
| LC 03 (F0) Lethality 1 | L-Calculation | 2:00:00 PM | 3:30:00 PM | 6.34       |
| LC 03 (F0) Lethality 2 | L-Calculation | 2:00:00 PM | 3:08:00 PM | 5.08       |
| LC 04 (F0) Lethality 1 | L-Calculation | 2:00:00 PM | 3:30:00 PM | 7.04       |
| LC 04 (F0) Lethality 2 | L-Calculation | 2:00:00 PM | 3:08:00 PM | 5.85       |
| LC 05 (F0) Lethality 1 | L-Calculation | 2:00:00 PM | 3:30:00 PM | 6.43       |
| LC 05 (F0) Lethality 2 | L-Calculation | 2:00:00 PM | 3:08:00 PM | 5.16       |
| LC 06 (F0) Lethality 1 | L-Calculation | 2:00:00 PM | 3:30:00 PM | 6.80       |
| LC 06 (F0) Lethality 2 | L-Calculation | 2:00:00 PM | 3:08:00 PM | 5.49       |
| LC 07 (F0) Lethality 1 | L-Calculation | 2:00:00 PM | 3:30:00 PM | 7.85       |
| LC 07 (F0) Lethality 2 | L-Calculation | 2:00:00 PM | 3:08:00 PM | 7.20       |
| LC 08 (F0) Lethality 1 | L-Calculation | 2:00:00 PM | 3:30:00 PM | 7.78       |
| LC 08 (F0) Lethality 2 | L-Calculation | 2:00:00 PM | 3:08:00 PM | 7.10       |
| LC 09 (F0) Lethality 1 | L-Calculation | 2:00:00 PM | 3:30:00 PM | 7.65       |
| LC 09 (F0) Lethality 2 | L-Calculation | 2:00:00 PM | 3:08:00 PM | 6.95       |

Note: Lethality 1 – Lethality calculation from both heating and cooling (included F-cooling)  
Lethality 2 – Delivered lethality from heating cycle only.

The graph shows the heat penetration attributes (retort temperature, core temperature, F0 value) of complete nutrition drink thermally processed by batch-overpressure water spray retort in retort pouch based on temperature (°C) and time (minutes). The mixture was preheated to 65°C before filling, and the initial temperature prior to processing was 35°C. Lethality (F0) of 5.08 and 6.30 for the fortified and control formula were achieved at 68 min and 90 min, respectively.

**Table S1. Selected parent-product ion m/z transitions and MS conditions used for BCAA and EPA quantification by LC-MS/MS**

| Compound   | Retention time (min) | Molecular weight | Precursor ion (m/z) | Product ion (m/z) | Collision energy (eV) | RF lens |
|------------|----------------------|------------------|---------------------|-------------------|-----------------------|---------|
| Leucine    | 3.01                 | 138.12           | 132.0               | 44.16             | 25V                   | 59      |
| Isoleucine | 3.01                 | 138.12           | 132.16              | 68.91             | 17.68V                | 59      |
| Valine     | 2.36                 | 123.10           | 118.03              | 72.08             | 10.25V                | 56      |
| EPA        | 2.21                 | 302.50           | 300.83              | 256.83            | 14V                   | 99      |

**Table S2. Microbial assessment in the control and fortified complete nutrition formulae after retort sterilization**

| Parameter                | Control formula | Fortified formula |
|--------------------------|-----------------|-------------------|
| Flat sour mesophile/ml   | Not detected    | Not detected      |
| Putrefactive anaerobe/ml | Not detected    | Not detected      |
| Flat sour thermophile/ml | Not detected    | Not detected      |
| Thermophilic anaerobe/ml | Not detected    | Not detected      |

Data was obtained from 7 packages each, following AOAC methods for the low-acid canned food. The tests were performed by ISO/ IEC 17025 certified laboratory.

Figure S2: Color of the control and fortified complete nutrition drink before and after retort sterilization

**a**

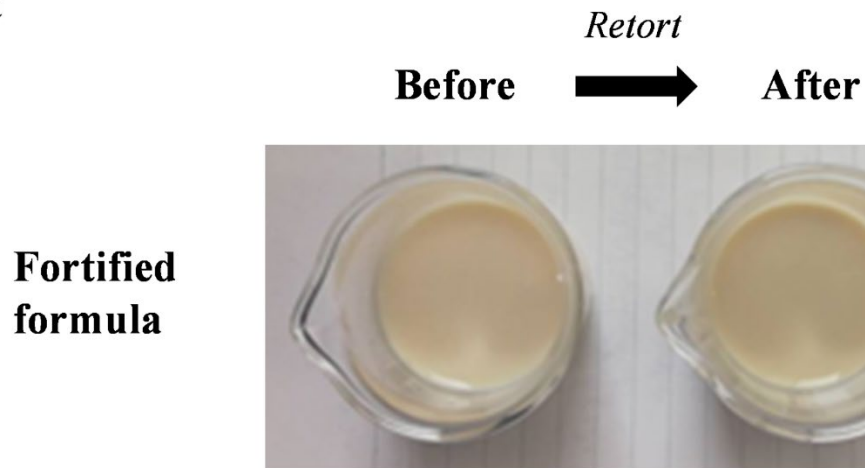

**b**

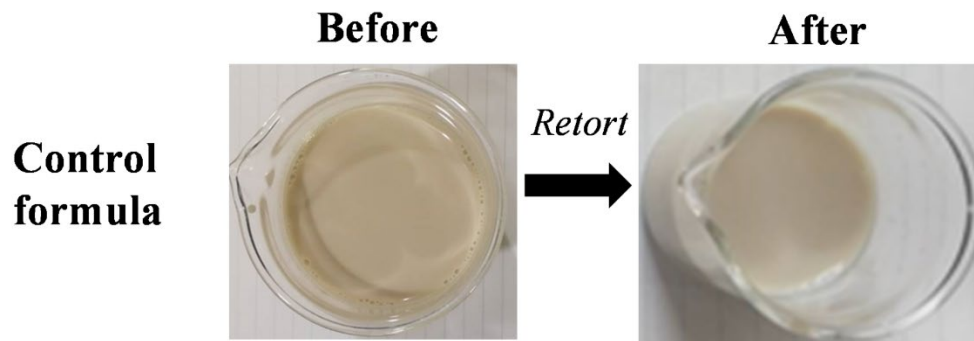

The picture shows the appearance of fortified (a) and control (b) formulae compared before and after retort processing.

Figure S3: Texture categorization of complete and fortified formulae according to IDDSI

**a** retorted control formula

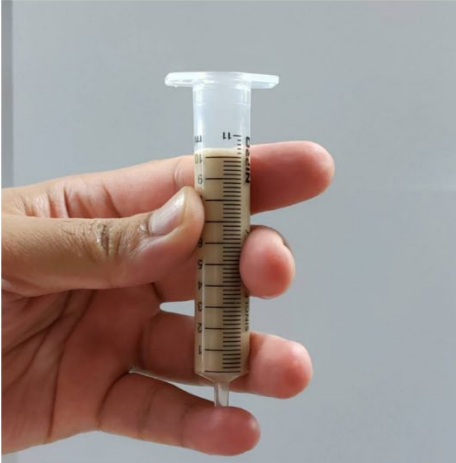

**b** retorted control formula after 10s

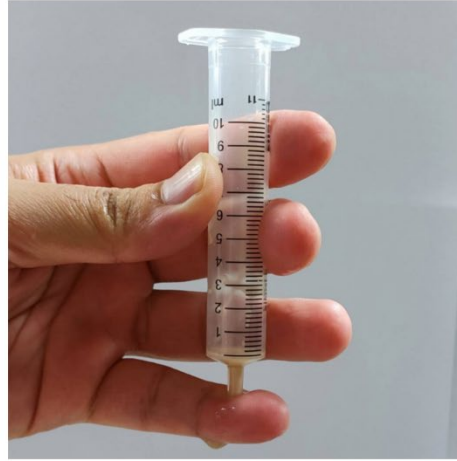

**c** retorted fortified formula

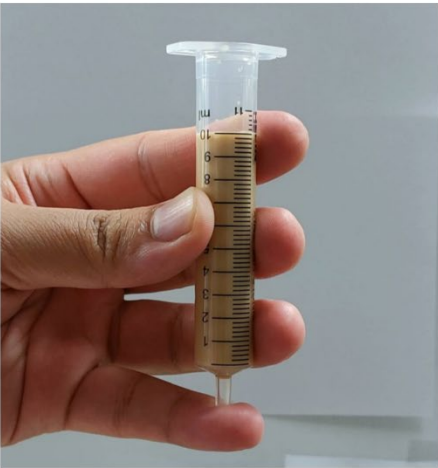

**d** retorted fortified formula after 10s

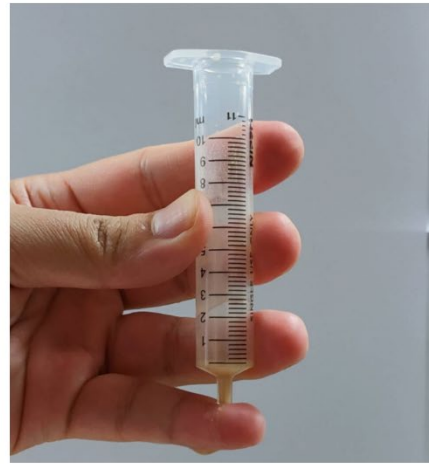

The pictures showed the amount of complete nutrition drink in the syringe before (**a and c**) and after 10 s (**b and d**) of the IDDSI flow test for the control and fortified formula, respectively.
